# Supplementary material
Source: PubMed Central journal article supplement (PMC7615113)
Supplement: EMS156632-supplement-Supplementary_information.pdf [file EMS156632-supplement-Supplementary_information.pdf]

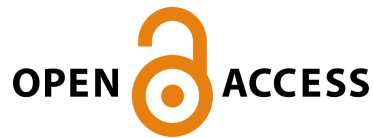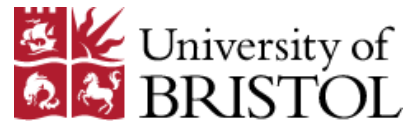

Sanderson, J. A., Bowden, V., Swire-Thompson, B., Lewandowsky, S., & Ecker, U. K. H. (2022). Listening to Misinformation while Driving: Cognitive Load and the Effectiveness of (Repeated) Corrections. *Journal of Applied Research in Memory and Cognition*.  
<https://doi.org/10.1037/mac0000057>

Peer reviewed version

Link to published version (if available):  
[10.1037/mac0000057](https://doi.org/10.1037/mac0000057)

[Link to publication record in Explore Bristol Research](#)  
PDF-document

This is the accepted author manuscript (AAM). The final published version (version of record) is available online via the American Psychological Association at <https://doi.org/10.1037/mac0000057>. Please refer to any applicable terms of use of the publisher.

## University of Bristol - Explore Bristol Research

### General rights

This document is made available in accordance with publisher policies. Please cite only the published version using the reference above. Full terms of use are available:  
<http://www.bristol.ac.uk/red/research-policy/pure/user-guides/ebr-terms/>

## Supplement

### Audio Event Reports Transcript

Host: Welcome back to our listeners at News Plus 86.5. My name is Elizabeth Goddard. Here's our daily run-down of what's making news around Australia.

#### *Bushfire*

Host: This past week in Victoria firefighters have been battling a bushfire that raged out of control in the state's North. The bushfire came dangerously close to homes in the town of Euroa, but it is believed that no damage has been caused to property. David Karle of the Country Fire Authority indicated that authorities were looking into the cause of the fire, with initial evidence suggesting that the fire had been deliberately lit. Reports state the fire was unlikely to pose any further threat to local communities. The suspected burn area is estimated to be roughly 50,000 hectares. After the break we'll cross over to David Karle to get the latest.

#### Music Interlude

Host: And we're back and we're going to speak with David Karle of the Country Fire Authority for the latest on the bushfire in Victoria. Hi David, what can you tell us about the fire?

Guest noR: Hi Liz, thanks for having me. Yes, I am glad to say that after two days of tireless work, our firefighters have managed to get this fire under control. There have been no reported casualties or damage to property, with most land damage occurring in rural areas and nearby forest reserves. We are lucky that no one was harmed by the fire, and some of the residents really feel that they have avoided disaster. We're appealing to everyone in the community to work together and have an up-to-date fire plan in place to be prepared for the future.

Guest 1R: Hi Liz, thanks for having me. Yes, I am glad to say that after two days of tireless work, our firefighters have managed to get this fire under control. There have been no reported casualties or damage to property, with most land damage occurring in rural areas and nearby forest reserves. **After further investigation, we now believe the fire was not caused by arson.** We are lucky that no one was harmed by the fire, and some of the residents really feel that they have avoided disaster. We're appealing to everyone in the community to work together and have an up-to-date fire plan in place to be prepared for the future.

Guest 3R: Hi Liz, thanks for having me. Yes, I am glad to say that after two days of tireless work, our firefighters have managed to get this fire under control. There have been no reported casualties or damage to property, with most land damage occurring in rural areas and nearby forest reserves. Our initial thoughts that **the fire was deliberately lit were unfounded.** We have now had some time to look at the evidence, so after further investigation, we now believe **the fire was not caused by arson.** We are lucky that no one was harmed by the fire, and some of the residents really feel that they have avoided disaster. I think they are also reassured that **this was not the work of an arsonist.** We're appealing to everyone in the community to work together and have an up-to-date fire plan in place to be prepared for the future.

Host: Thanks for taking the time to talk to us, David. It's really important during times like this that we stick together.

Host: Stay tuned after this break we will see what's happening in the Northern Territory.

Music Interlude

### ***Emergency Landing***

Host: In the Northern Territory, passengers on an international flight en route to Sydney received a terrible fright yesterday as their plane required an emergency landing.

Peter Fern, the pilot of the aircraft, made the decision to land ahead of schedule. Investigators believe the pilot made the right decision, and attributed the emergency landing of the aircraft to extreme weather conditions. The aircraft was able to make a safe landing at Darwin International Airport, and all 136 passengers on board were evacuated without problem. The aircraft involved was an Airbus A320. After the break we'll cross over to local reporter Cindy Marshall for her updates on the situation.

#### Music Interlude

Host: We've got local reporter Cindy Marshall on the line. Hi Cindy, thanks for joining us. Can you tell us more about what's happened?

Guest noR: Yes Liz; passengers on this international flight that had to make an emergency landing at Darwin airport were forced to stay overnight at the Mercure Darwin Airport Resort while the airline arranged a suitable replacement aircraft. I've spoken with several of the passengers about their ordeal – loose items were getting thrown around the cabin, and the seatbelts were hardly containing the passengers. One passenger is particularly relieved to be back on the ground as it is her birthday today, and she is looking forward to seeing her family. Passengers have praised the pilot for landing safely. The airport has provided passengers with accommodation and complimentary food on behalf of the airline. A replacement aircraft has been organized and people are now on their way to Sydney.

Guest 1R: Yes Liz; passengers on this international flight that had to make an emergency landing at Darwin airport were forced to stay overnight at the Mercure Darwin Airport Resort while the airline arranged a suitable replacement aircraft. I've spoken with several of the passengers about their ordeal – loose items were getting thrown around the cabin, and the seatbelts were hardly containing the passengers. One passenger is particularly relieved to be back on the ground as it is her birthday today, and she is looking forward to seeing her family. Passengers have praised the pilot for landing safely. **Investigators have**

**found that previous attributions to extreme weather were incorrect.** The airport has provided passengers with accommodation and complimentary food on behalf of the airline. A replacement aircraft had been organized and people are now on their way to Sydney.

Guest 3R: Yes Liz; passengers on this international flight that had to make an emergency landing at Darwin airport were forced to stay overnight at the Mercure Darwin Airport Resort while the airline arranged a suitable replacement aircraft. I've spoken with several of the passengers about their ordeal – loose items were getting thrown around the cabin, and the seatbelts were hardly containing the passengers. One passenger is particularly relieved to be back on the ground as it is her birthday today, and she is looking forward to seeing her family. Passengers have praised the pilot for landing safely. Investigators have found that previous **attributions to extreme weather were incorrect**; there was a press conference earlier where a statement was issued that **extreme weather did not play any role** in the emergency landing. The airport has provided passengers with accommodation and complimentary food on behalf of the airline. The airline has been informed that **weather was not the cause of the issue** and are still investigating. A replacement aircraft had been organized and people are now on their way to Sydney.

Host: Thanks Cindy for the update.

Host: Next up we are going to Queensland.

Music Interlude

### ***Woman's Collapse***

Host: In Queensland, 21-year-old international model Sophia Taticchi has been taken to hospital after losing consciousness whilst out partying at the Cable nightclub on the Gold Coast in the early hours of the morning. A friend of Taticchi said she had complained of hallucinations and nausea not long before falling unconscious. Doctors believe the symptoms were the result of her drink being spiked. A recent series of drink-spiking incidents at local

nightclubs has led to renewed calls for the introduction of a bottled-drinks-only policy. The incident comes as a reminder to party-goers to be careful with their drinks and always stay with friends. We're now going to catch up with Ben Smith from our studio in Brisbane.

#### Music Interlude

Host: Hi Ben, how's Sophia, do we know any more about what happened?

Guest noR: Yes Liz, Sophia has remained in hospital. She was out celebrating with friends after a fashion show when she collapsed and required medical attention. Further tests are being conducted, but she is due to be released from hospital later today. Taticchi's agent released a media statement that Sophia is in good spirits. Now as you know, Sophia is a Gold Coast local, and her friends and family have been at her bedside. We've spoken to her but she has no memory of what happened at the nightclub.

Guest 1R: Yes Liz, Sophia has remained in hospital. She was out celebrating with friends after a fashion show when she collapsed and required medical attention. **The doctors have now ruled out drink-spiking as the cause of her symptoms.** Further tests are being conducted, but she is due to be released from hospital later today. Taticchi's agent released a media statement that Sophia is in good spirits. Now as you know, Sophia is a Gold Coast local, and her friends and family have been at her bedside. We've spoken to her but she has no memory of what happened at the nightclub.

Guest 3R: Yes Liz, Sophia has remained in hospital. She was out celebrating with friends after a fashion show when she collapsed and required medical attention. The doctors have now **ruled out drink-spiking as the cause of her symptoms.** Further tests are being conducted on Sophia, but there is **no evidence that her drink was spiked**, and she is due to be released from hospital later today. Taticchi's agent released a media statement that Sophia is in good spirits. While **drink spiking didn't cause Sophia's collapse**, she urged party-goers to execute caution at nightclubs. Now as you know, Sophia is a Gold Coast local, and

her friends and family have been at her bedside. We've spoken to her but she has no memory of what happened at the nightclub.

Host: Thanks Ben. We hope Sophia makes a full recovery.

Host: Now over to South Australia.

Music Interlude

### ***Train Derailment***

Host: A passenger train was derailed earlier this morning near Adelaide in South Australia. The accident occurred around 8.30am during the busy commuting period. Initial reports suggest that as many as twenty passengers sustained injuries. Transport authorities believe the derailment was due to the train travelling at excessive speed around a sharp bend of the track. Emergency services were called in from neighbouring councils to assist with the recovery efforts. The injured were brought to local hospitals, and the train line between Gawler and North Adelaide has been closed until further notice. Replacement buses will be available, but commuters have been urged to seek alternative arrangements if possible. Let's cross to Michelle Jones from Adelaide Metro for an update.

Music Interlude

Host: Hi Michelle. What's the latest on the train derailment?

Guest noR: Hi Liz, the confirmed number of injured passengers from the train derailment in Adelaide has now been put at 19. Among the injured were tourists and Adelaide locals, including the local sports star James Wilby. We've spoken to a passenger on board. They said there had been no warning signs and all of a sudden personal items and people were flying through the air. The passenger described that there was a moment of silence and weightlessness before a horrible bang and the sound of screeching metal. It seems like it was a terrifying event for all involved. The line will remain closed for a number of days while the site is cleared.

Guest 1R: Hi Liz, the confirmed number of injured passengers from the train derailment in Adelaide has now been put at 19. Among the injured were tourists and Adelaide locals, including the local sports star James Wilby. **The transport authorities have concluded that speed was not a factor in the derailment.** We've spoken to a passenger on board. They said there had been no warning signs and all of a sudden personal items and people were flying through the air. The passenger described that there was a moment of silence and weightlessness before a horrible bang and the sound of screeching metal. It seems like it was a terrifying event for all involved. The line will remain closed for a number of days while the site is cleared.

Guest 3R: Hi Liz, the confirmed number of injured passengers from the train derailment in Adelaide has now been put at 19. Among the injured were tourists and Adelaide locals, including the local sports star James Wilby. The transport authorities have concluded that **speed was not a factor in the derailment.** We've spoken to a passenger on board. They said there had been no warning signs and all of a sudden personal items and people were flying through the air. The passenger described that there was a moment of silence and weightlessness before a horrible bang and the sound of screeching metal, but there is **no evidence that the train was going excessively fast.** It seems like it was a terrifying event for all involved, but ultimately, **speed is not considered to have played a role.** The line will remain closed for a number of days while the site is cleared.

Host: Thanks Michelle. Our thoughts are with the victims' families.

Host: Next, we are going to catch up with what's going on in Tasmania.

Music Interlude

### ***Fish Kill***

Host: In Tasmania, the Hillwood Water Department has been forced to shut down intake from its main water supply, the River Tamar, due to large scale fish deaths in the



waterway. The department supplies water to the local region. It is believed that the fish deaths were due to contamination caused by dumping of chemical waste by a riverside pharmaceutical company, in violation of the Tasmanian Clean Water Act. The water department stated it remained committed to ensuring that customers can be confident that their water supply is of the purest quality. Rangers have begun clearing the dead fish from the waterway. After this, we'll chat with local reporter Kate Gettys.

#### Music Interlude

Host: And we're back with Kate for an update.

Guest noR: Hi, Elizabeth. Authorities here have been given the all-clear to continue water intake from the River Tamar, after operations had ceased for 5 days due to unexpected mass fish deaths in the waterway. The incident had residents concerned and occupied local news headlines all week. The water-intake shutdown was a critical issue for the region, as recent drought periods have resulted in record low water levels. I've spoken with a number of locals and many are concerned about its impacts on their businesses. Residents have been reassured that the local drinking water is as safe as it has ever been.

Guest 1R: Hi, Elizabeth. Authorities here have been given the all-clear to continue water intake from the River Tamar, after operations had ceased for 5 days due to unexpected mass fish deaths in the waterway. **Tests by the local water department have now confirmed that a chemical spill was not the cause.** The incident had residents concerned and occupied local news headlines all week. The water-intake shutdown was a critical issue for the region, as recent drought periods have resulted in record low water levels. I've spoken with a number of locals and many are concerned about its impacts on their businesses. Residents have been reassured that the local drinking water is as safe as it has ever been.

Guest 3R: Hi, Elizabeth. Authorities here have been given the all-clear to continue water intake from the River Tamar, after operations had ceased for 5 days due to unexpected

mass fish deaths in the waterway. Tests by the local water department have now confirmed that **a chemical spill was not the cause**. The incident had residents concerned and occupied local news headlines all week. While there is **no evidence that chemicals contributed to the fish deaths**, the water-intake shutdown was a critical issue for the region, as recent drought periods have resulted in record low water levels. I've spoken with a number of locals and many are concerned about its impacts on their businesses. Residents have been reassured that **a chemical spill was not the cause of the fish kill**, and most importantly, that the local drinking water is as safe as it has ever been.

Host: Thanks Kate. We hope local business gets back to normal soon.

Host: We'll see what is happening in New South Wales.

Music Interlude

### *Death of a Drug Dealer*

Host: In New South Wales, the death of a notorious drug dealer, known on the street as 'Coach', is being treated as suspicious. He had been under investigation for several months by police regarding his alleged involvement in the trade of methamphetamines. At this stage of the investigation, authorities believe the death was the result of an assault in what appears to have been a drug deal gone wrong, and various members of the local drug scene are being investigated. A neighbour discovered the man in his Bankstown home during the early hours of Saturday morning. The man had been dead for several hours before he was found.

Sergeant Barry Wade from the NSW Police Force has asked anybody who has witnessed any suspicious behaviour in the area to contact authorities. After this, we'll chat with NSW reporter Henry Williams for the latest.

Music Interlude

Host: Hi Henry. Are there any updates on the situation?

Guest noR: Hi Liz. A clandestine drug lab has been discovered in the home of the drug dealer who died in his Bankstown home yesterday. Methamphetamines, as well as a surveillance camera system, computers, and \$20,000 in cash, have been seized from the property. On behalf of the family, the deceased man's sister said they were extremely upset by their family member's death. The funeral is scheduled for tomorrow afternoon and will be attended by friends and family of the deceased under police observation.

Guest 1R: Hi Liz. A clandestine drug lab has been discovered in the home of the drug dealer who died in his Bankstown home yesterday. Methamphetamines, as well as a surveillance camera system, computers, and \$20,000 in cash, have been seized from the property. **Authorities have revealed that an autopsy report has found the original suspicions of a death by assault were false.** On behalf of the family, the deceased man's sister said they were extremely upset by their family member's death. The funeral is scheduled for tomorrow afternoon and will be attended by friends and family of the deceased under police observation.

Guest 3R: Hi Liz. A clandestine drug lab has been discovered in the home of the drug dealer who died in his Bankstown home yesterday. Methamphetamines, as well as a surveillance camera system, computers, and \$20,000 in cash, have been seized from the property. Authorities have revealed that the original **suspicions of a death by assault were false.** An autopsy report has been handed down, which found **no evidence to suggest the dealer was assaulted.** On behalf of the family, the deceased man's sister said they were extremely upset by their family member's death but were relieved that **it was not due to an assault.** The funeral is scheduled for tomorrow afternoon and will be attended by friends and family of the deceased under police observation.

Host: Thanks for the update Henry.

Host: Next we'll head to Victoria.

## Music Interlude

Host: So that's our daily run-down of what's making news around Australia. Keep listening to News Plus 86.5 to stay informed.

## Inference Questions

### *Bushfire*

- I1. Malicious intent contributed to the fire. (0-10 scale from "Completely disagree" to "Completely agree")
- I2. It would be lawful for someone to be punished as a result of the bushfire. (0-10 scale from "Completely disagree" to "Completely agree")
- I3. Someone should be identified and charged for causing the bushfire. (0-10 scale from "Completely disagree" to "Completely agree")
- I4. What do you think was the main cause of the fire? (a. Accident; b. Extreme heat; c. Arson; d. Lightning; e. None of the above)

### *Emergency Landing*

- I1. The accuracy of the pre-flight weather reports should be scrutinized. (0-10 scale from "Completely disagree" to "Completely agree")
- I2. Bad weather contributed to the emergency landing. (0-10 scale from "Completely disagree" to "Completely agree")
- I3. "Severe weather forces emergency landing" would be an appropriate headline for this report. (0-10 scale from "Completely disagree" to "Completely agree")
- I4. What do you think was the main cause of the incident? (a. Bad weather; b. Lack of servicing; c. Foul play; d. Pilot error; e. None of the above)

### *Woman's Collapse*

- I1. Police should investigate the circumstances of the woman's collapse. (0-10 scale from "Completely disagree" to "Completely agree")

I2. It is likely that the incident resulted from an illegal activity occurring at the nightclub. (0-10 scale from “Completely disagree” to “Completely agree”)

I3. Someone should be held responsible for the incident. (0-10 scale from “Completely disagree” to “Completely agree”)

I4. What do you think was the cause of the woman’s collapse? (a. Dehydration; b. Drink spiking; c. Alcohol; d. A medical condition; e. None of the above)

### ***Train Derailment***

I1. The driver of the derailed train should be charged with misconduct. (0-10 scale from “Completely disagree” to “Completely agree”)

I2. Dangerous actions by the driver contributed to the derailment. (0-10 scale from “Completely disagree” to “Completely agree”)

I3. "Train derailed by reckless driver" would be an appropriate headline for this report. (0-10 scale from “Completely disagree” to “Completely agree”)

I4. What do you think was the cause of the derailment? (a. Collision; b. Mechanical failure; c. Tampering with the track; d. Speeding; e. None of the above)

### ***Fish Kill***

I1. The pharmaceutical company should start an internal investigation and review their procedures. (0-10 scale from “Completely disagree” to “Completely agree”)

I2. Chemical contamination contributed to the incident. (0-10 scale from “Completely disagree” to “Completely agree”)

I3. The pharmaceutical company should be fined. (0-10 scale from “Completely disagree” to “Completely agree”)

I4. What do you think was the cause of the fish deaths? (a. Chemical spill; b. Water temperature; c. Virus; d. Algae bloom; e. None of the above)

### ***Death of a Drug Dealer***

- I1. Police should be looking for someone who is responsible for the drug dealer's death. (0-10 scale from "Completely disagree" to "Completely agree")
- I2. It would be appropriate for someone to be convicted as a result of the drug dealer's death. (0-10 scale from "Completely disagree" to "Completely agree")
- I3. "Dealer dead after drug deal gone wrong" would be a good headline for this report. (0-10 scale from "Completely disagree" to "Completely agree")
- I4. What do you think was the cause of the drug dealer's death? (a. Heart attack; b. Overdose; c. Assault; d. Accident; e. None of the above).

### **Memory Questions**

#### ***Bushfire***

- F1. Where did the bushfire occur? (a. Shepparton, b. Euroa, c. Benalla, d. Kyneton).
- F2. How many hectares of land was burnt? (a. 100,000; b. 25,000; c. 200,000; d. 50,000).
- F3. How many days did it take to get the fire under control? (a. 2; b. 5; c. 7; d. 10).
- F4. What was David Karle appealing to the community for? (a. An up-to-date fire plan; b. Donations; c. Manage vegetation around homes; d. Attend community bushfire meetings).

#### ***Emergency Landing***

- F1. Where was the airplane flying to? (a. Melbourne; b. Sydney; c. Perth; d. Adelaide).
- F2. What type of aircraft was involved? (a. Boeing 747; b. Airbus A320; c. Boeing 787; d. Airbus A380).
- F3. What airport did the airplane land at? (a. Hobart; b. Brisbane; c. Darwin; d. Broome).
- F4. Why was one passenger particularly relieved to be back on the ground? (a. She was heavily pregnant; b. It was her birthday; c. It was her graduation; d. It was her anniversary).

#### ***Woman's Collapse***

- F1. What nightclub was the woman partying at? (a. Loft; b. Metro; c. Cable; d. Wire).
- F2. What was the woman's occupation? (a. Musician; b. Actress; c. Model; d. Comedian).

F3. What were the woman and her friends celebrating? (a. Fashion show; b. Promotion; c. Charity gala; d. Engagement).

F4. Who spoke on behalf of the woman? (a. Family; b. Publicist; c. Agent; d. Boyfriend).

### ***Train Derailment***

F1. What time did the accident occur? (a. 6:00am; b. 8:30am; c. 12 noon; d. 10:30pm).

F2. Which train line was closed? (a. Between Gawler and North Adelaide; b. Between Belair and Adelaide Showground; c. Between Glanville and Croydon; d. Between Grange and Adelaide).

F3. What was the reported number of injuries from the derailment? (a. 42; b. 19; c. 10; d. 104).

F4. Which local was among the injured? (a. Geraldine Davies; b. Alex Robinson-Clarke; c. Karim Ammun; d. James Wilby).

### ***Fish Kill***

F1. What was the name of the water department? (a. Harding; b. Hillwood; c. Joplin; d. Shelby).

F2. What was the name of the river that the water supply came from? (a. Derwent; b. Sorell; c. Forth; d. Tamar).

F3. What contributed to low water storage levels? (a. Over-usage; b. Drought; c. Containment leak; d. Pump failure).

F4. How many days was intake from the water supply shut down for? (a. 1; b. 5; c. 13; d. 21).

### ***Death of a Drug Dealer***

F1. What was the nickname of the drug dealer? (a. Priest; b. Shrink; c. Doc; d. Coach)

F2. Who found the body? (a. Friend; b. Police; c. Neighbor; d. Landlord).

F3. What kind of drug did police find on the property? (a. Cannabis; b. Heroin; c. Methamphetamine; d. Ecstasy).

F4. How much money was confiscated? (a. \$50,000; b. \$20,000; c. \$80,000; d. \$100,000).

### Driving Performance

Descriptive statistics across conditions are presented in Table S1.

**Table S1**

*Descriptive Statistics for Average Speed (km/h), Speed Variability, and Positional Variability across No-load and Load Conditions.*

|                        | <i>Condition</i> | <i>M</i> | <i>SD</i> |
|------------------------|------------------|----------|-----------|
| Average Speed          | Across-noL       | 49.38    | 1.25      |
|                        | Within-noL       | 49.57    | 1.28      |
|                        | Load             | 48.77    | 1.62      |
| Speed Variability      | Across-noL       | 1.61     | .57       |
|                        | Within-noL       | 1.54     | .75       |
|                        | Load             | 2.32     | .82       |
| Positional Variability | Across-noL       | .15      | .05       |
|                        | Within-noL       | .16      | .05       |
|                        | Load             | .24      | .09       |

*Note.* noL, no load.

### Original Analysis of Inference Scores

For the multiple-choice inference questions, the response option associated with the critical information was scored 10, the lure options were scored 0. For each report, an inference score was calculated as the mean response to the three rating-scale items and the multiple-choice inference question. Higher inference scores indicated greater misinformation reliance, with a maximum possible score of 10.

The mean inference scores across load and retraction conditions are shown in Figure S1.



## Figure S1

### Mean Inference Scores across Conditions

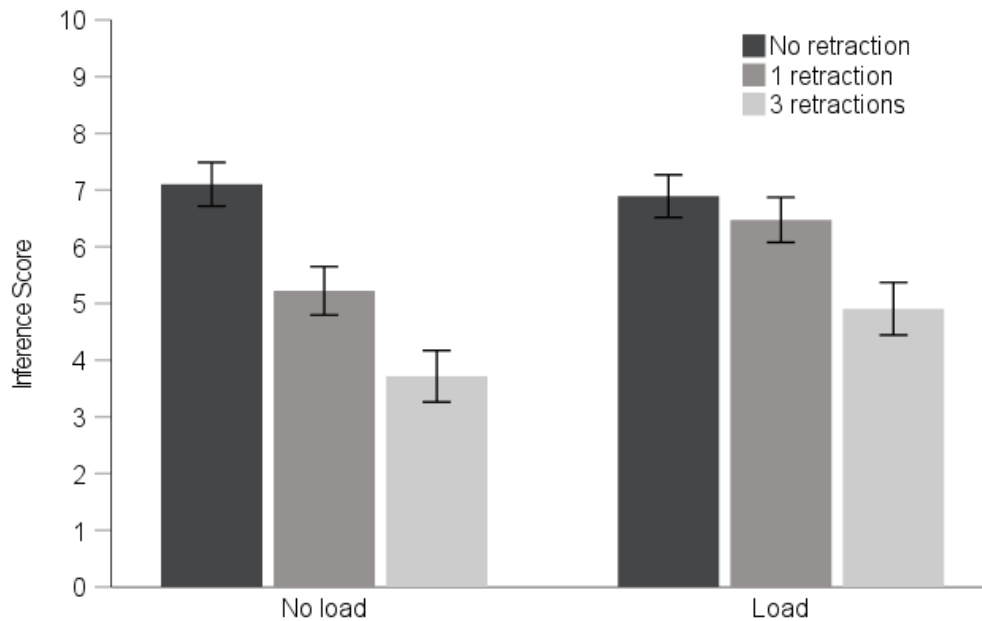

*Note.* Error bars denote 95% confidence intervals.

The inference score data were analysed using a linear mixed-effects model in RStudio (RStudio Team, 2020), using the *lme4* (Bates et al., 2015) and *lmerTest* (Kuznetsova et al., 2017) packages. The first model, which specified random intercepts and slopes for the retraction  $\times$  load interaction effect for each event-report scenario, did not converge. We then removed the interaction term in the scenario random effect, and then we removed load in the scenario random effect; both models did not converge. The maximal model (see Barr et al., 2013) to converge specified centred retraction and load factors, as well as their interaction, as fixed effects, and included random intercepts for participants and event-report scenarios, as well as random slopes for the effect of load by scenario.<sup>1</sup>

<sup>1</sup> Adding indicators of participants' event memory, math performance, and driving performance as predictors did not change the outcome.

A regression using this model returned a significant main effect of retraction, showing that corrections facilitated belief updating ( $\beta = -1.35$ ,  $SE = 0.09$ ,  $t = -14.57$ ,  $p < .001$ ), as well as a significant main effect of load, indicating that load hindered belief updating ( $\beta = 0.74$ ,  $SE = 0.19$ ,  $t = 3.97$ ,  $p = .011$ ). There was also a significant retraction  $\times$  load interaction ( $\beta = 0.63$ ,  $SE = 0.20$ ,  $t = 3.15$ ,  $p = .002$ ), indicating that load differentially influenced belief updating depending on the retraction condition.<sup>2</sup>

We followed this up with simple-effects analyses<sup>3</sup> to test our specific hypotheses (see Table S2). These demonstrated that a retraction was effective in reducing inference scores—and thus misinformation reliance—compared to no-retraction when encoded without load (Contrast 1). Three retractions reduced inference scores further (Contrast 2). By contrast, one retraction processed under load failed to reduce inference scores relative to no-retraction (Contrast 3), although three retractions effected a reduction in inference scores (Contrast 4), which was of comparable magnitude to the reduction associated with one retraction processed without load. Load had no impact if no retraction was provided (Contrast 5) but impaired the effectiveness of both a single and multiple retractions (Contrasts 6 & 7).

---

<sup>2</sup> This interaction was no longer significant when excluding the no-retraction conditions which suggests that load affects the effectiveness of retractions per se but does not reduce the differential benefit of three over one retraction.

<sup>3</sup> These used just the one relevant fixed effect and random intercepts for participant and scenario.

**Table S2***Simple Effects Analyses on Inference Scores*

| Contrast # | Contrast          | $\beta$ | <i>SE</i> | <i>t</i> | <i>df</i> | <i>p</i> |
|------------|-------------------|---------|-----------|----------|-----------|----------|
| 1          | noL-0R vs. noL-1R | -1.91   | 0.26      | -7.27    | 346       | <.001    |
| 2          | noL-1R vs. noL-3R | -0.71   | 0.14      | -5.18    | 337       | <.001    |
| 3          | L-0R vs. L-1R     | -0.45   | 0.24      | -1.90    | 318       | .059     |
| 4          | L-1R vs. L-3R     | -0.77   | 0.14      | -5.65    | 354       | <.001    |
| 5          | noL-0R vs. L-0R   | -0.27   | 0.24      | -1.13    | 448       | .261     |
| 6          | noL-1R vs. L-1R   | 1.25    | 0.25      | 4.97     | 229       | <.001    |
| 7          | noL-3R vs. L-3R   | 1.01    | 0.31      | 3.27     | 459       | .001     |

*Note.* noL, no load; L, load; 0R, no retraction; 1R, one retraction; 3R, three retractions.
